# Supplementary material for: Sexual Violence and Risk of Hypertension in Women in the Nurses’ Health Study II: A 7‐Year Prospective Analysis
Source: PubMed Central journal article supplement — J Am Heart Assoc. 2022 Feb 22;11(5):e023015. doi: 10.1161/JAHA.121.023015 (PMC9075082; doi:10.1161/jaha.121.023015), 2022-02-22
Supplement: JAH3-11-e023015-s001.pdf [file JAH3-11-e023015-s001.pdf]

# **Supplemental Material**

**Table S1. Age-standardized characteristics by sexual assault among 33,127 women in the Nurses' Health Study II at start of follow-up in 2008.**

|                                                   | Sexual assault         |                                                    |                             |
|---------------------------------------------------|------------------------|----------------------------------------------------|-----------------------------|
|                                                   | No trauma<br>(n=6,617) | Other (non-sexual<br>assault) trauma<br>(n=18,765) | Sexual assault<br>(n=7,745) |
| <b>Sociodemographic factors</b>                   |                        |                                                    |                             |
| Age (years) <sup>§</sup>                          | 53 (4.7)               | 53.1 (4.7)                                         | 53.1 (4.5)                  |
| Race/ethnicity                                    |                        |                                                    |                             |
| Non-Hispanic white, %(n)                          | 95.2 (6,200)           | 95.7 (17,692)                                      | 94.9 (7,265)                |
| Black, %(n)                                       | 0.5 (35)               | 0.5 (93)                                           | 0.8 (64)                    |
| Other race/ethnicity*, %(n)                       | 4.3 (280)              | 3.8 (706)                                          | 4.3 (330)                   |
| <b>Childhood and family factors</b>               |                        |                                                    |                             |
| Parental education                                |                        |                                                    |                             |
| High school or less, %(n)                         | 49.3 (3,126)           | 49.3 (8,872)                                       | 48.8 (3,612)                |
| Some college, %(n)                                | 24.4 (1,551)           | 24.8 (4,467)                                       | 24.7 (1,830)                |
| 4+ years of college, %(n)                         | 26.3 (1,670)           | 25.9 (4,652)                                       | 26.4 (1,954)                |
| Highest somatotype at age 5 <sup>¶</sup> , %(n)   | 5.6 (362)              | 5.9 (1,081)                                        | 6.4 (490)                   |
| Maternal hypertension, %(n)                       | 25.6 (1,696)           | 25.0 (4,699)                                       | 25.0 (1,938)                |
| Paternal hypertension, %(n)                       | 26.1 (1,728)           | 27.3 (5,118)                                       | 26.7 (2,070)                |
| <b>Adult health behaviors and conditions</b>      |                        |                                                    |                             |
| Body mass index <sup>‡</sup> (kg/m <sup>2</sup> ) | 25.7 (5.2)             | 25.8 (5.2)                                         | 26.1 (5.4)                  |
| Diet quality score <sup>‡</sup>                   | 57.3 (12.1)            | 58 (12.1)                                          | 58.9 (12.2)                 |
| Physical activity <sup>††</sup> (MET-hrs/wk)      | 26.7 (31.8)            | 27.1 (30.6)                                        | 27.2 (32.1)                 |
| Current smoker, %(n)                              | 4.5 (298)              | 5.0 (931)                                          | 6.9 (535)                   |
| Alcohol use <sup>††</sup> (g/d)                   | 6.6 (9.7)              | 6.6 (9.7)                                          | 7.2 (10.9)                  |
| <b>Psychological distress</b>                     |                        |                                                    |                             |
| Posttraumatic stress disorder, %(n)               | 0.0 (0)                | 2.4 (450)                                          | 7.4 (576)                   |
| Depression, %(n)                                  | 10.7 (696)             | 16.1 (2,996)                                       | 25.9 (1,994)                |

Note: Values are means (standard deviations) for continuous variables; percentages (n's) for categorical variables, and are standardized to the age distribution of the study population. Values of polytomous variables may not sum to 100% due to rounding or missing. Abbreviations: MET-hrs/wk: metabolic equivalent task hours per week; kg/m<sup>2</sup>: kilogram per (meter squared); g/d: grams per day.

<sup>§</sup>Value is not age adjusted.

\*Other race/ethnicities include Hispanic, Asian and other ethnicities and are presented as one category here for brevity.

<sup>¶</sup>Only certain categories for somatotype at age 5 and smoking status are presented here for brevity. Highest somatotype refers to the highest category of somatotype responses.

‡Diet quality and body mass index are presented before mean imputation. Diet quality was based on the Alternative Healthy Eating Index. A higher diet quality score indicates a higher quality diet.

††Continuous variables for physical activity and alcohol use are presented here for brevity.

**Table S2. Age-standardized characteristics by workplace sexual harassment among 33,127 women in the Nurses' Health Study II at start of follow-up in 2008.**

|                                                   | Sexual harassment      |                                                          |                                   |
|---------------------------------------------------|------------------------|----------------------------------------------------------|-----------------------------------|
|                                                   | No trauma<br>(n=6,617) | Other (non-sexual<br>harassment)<br>trauma<br>(n=22,433) | Sexual<br>harassment<br>(n=4,077) |
| <b>Sociodemographic factors</b>                   |                        |                                                          |                                   |
| Age (years) <sup>§</sup>                          | 53 (4.7)               | 53.1 (4.7)                                               | 53.3 (4.5)                        |
| <b>Race/ethnicity</b>                             |                        |                                                          |                                   |
| Non-Hispanic white, %(n)                          | 95.2 (6,200)           | 95.4 (21,105)                                            | 95.5 (3,848)                      |
| Black, %(n)                                       | 0.5 (35)               | 0.6 (129)                                                | 0.8 (32)                          |
| Other race/ethnicity*, %(n)                       | 4.3 (280)              | 4.0 (889)                                                | 3.7 (148)                         |
| <b>Childhood and family factors</b>               |                        |                                                          |                                   |
| <b>Parental education</b>                         |                        |                                                          |                                   |
| High school or less, %(n)                         | 49.3 (3,126)           | 49.5 (10,646)                                            | 47.7 (1,859)                      |
| Some college, %(n)                                | 24.4 (1,551)           | 24.7 (5,298)                                             | 25.7 (1,000)                      |
| 4+ years of college, %(n)                         | 26.3 (1,670)           | 25.8 (5,547)                                             | 26.6 (1,036)                      |
| Highest somatotype at age 5 <sup>¶</sup> , %(n)   | 5.6 (362)              | 6.0 (1,324)                                              | 6.4 (257)                         |
| Maternal hypertension, %(n)                       | 25.6 (1,696)           | 24.9 (5,597)                                             | 25.4 (1,037)                      |
| Paternal hypertension, %(n)                       | 26.1 (1,728)           | 27.0 (6,060)                                             | 28.0 (1,141)                      |
| <b>Adult health behaviors and conditions</b>      |                        |                                                          |                                   |
| Body mass index <sup>‡</sup> (kg/m <sup>2</sup> ) | 25.7 (5.2)             | 25.9 (5.3)                                               | 25.9 (5.2)                        |
| Diet quality score <sup>‡</sup>                   | 57.3 (12.1)            | 58.1 (12.1)                                              | 59.4 (12.3)                       |
| Physical activity <sup>††</sup> (MET-hrs/wk)      | 26.7 (31.8)            | 26.9 (30.6)                                              | 28.7 (33.2)                       |
| Current smoker, %(n)                              | 4.5 (298)              | 5.3 (1197)                                               | 6.6 (269)                         |
| Alcohol use <sup>††</sup> (g/d)                   | 6.6 (9.7)              | 6.7 (9.9)                                                | 7.3 (10.8)                        |
| <b>Psychological distress</b>                     |                        |                                                          |                                   |
| Posttraumatic stress disorder, %(n)               | 0.0 (0)                | 3.3 (734)                                                | 7.4 (303)                         |
| Depression, %(n)                                  | 10.7 (696)             | 17.6 (3,921)                                             | 26.7 (1,085)                      |

Note: Sexual harassment refers to workplace sexual harassment. Values are means (standard deviations) for continuous variables; percentages (n's) for categorical variables, and are standardized to the age distribution of the study population. Values of polytomous variables may not sum to 100% due to rounding or missing. Abbreviations: MET-hrs/wk: metabolic equivalent task hours per week; kg/m<sup>2</sup>: kilogram per (meter squared); g/d: grams per day.

<sup>§</sup>Value is not age adjusted.

\*Other race/ethnicities include Hispanic, Asian and other ethnicities and are presented as one category here for brevity.

<sup>¶</sup>Only certain categories for somatotype at age 5 and smoking status are presented here for brevity. Highest somatotype refers to the highest category of somatotype responses.

<sup>‡</sup>Diet quality and body mass index are presented before mean imputation. Diet quality was based on the Alternative Healthy Eating Index. A higher diet quality score indicates a higher quality diet.

<sup>††</sup>Continuous variables for physical activity and alcohol use are presented here for brevity.

**Table S3. Cox proportional hazards estimates for the association between sexual violence and hypertension (incident hypertension or initiation of antihypertensive medication use) among 33,127 women in NHS II for follow-up between 2008-2015.** Sensitivity analysis additionally adjusting for PTSD and depression.

|                                                  |                           | Model 2 + PTSD and depression |         | Model 3 + PTSD and depression |         |
|--------------------------------------------------|---------------------------|-------------------------------|---------|-------------------------------|---------|
|                                                  | n for cases / person-year | HR (95% CI)                   | p-value | HR (95% CI)                   | p-value |
| <i>N=7,096 events among 249,467 person-years</i> |                           |                               |         |                               |         |
| <b>Sexual Assault</b>                            |                           |                               |         |                               |         |
| No Trauma                                        | 1349/50354                | 1.00 (Reference)              |         |                               |         |
| Other (non-sexual assault) trauma                | 4008/141709               | 1.04 (0.98, 1.11)             | 0.23    | 1.03 (0.97, 1.10)             | 0.34    |
| Sexual assault                                   | 1739/57717                | 1.09 (1.01, 1.17)             | 0.02    | 1.05 (0.978, 1.13)            | 0.17    |
| <b>Sexual Harassment</b>                         |                           |                               |         |                               |         |
| No Trauma                                        | 1349/50354                | 1.00 (Reference)              |         |                               |         |
| Other (non-sexual harassment) trauma             | 4799/168993               | 1.04 (0.98, 1.11)             | 0.20    | 1.02 (0.96, 1.09)             | 0.45    |
| Sexual harassment                                | 948/30433                 | 1.12 (1.03, 1.22)             | 0.01    | 1.11 (1.02, 1.21)             | 0.01    |
| <b>Sexual Assault and Harassment</b>             |                           |                               |         |                               |         |
| No Trauma                                        | 1349/50354                | 1.00 (Reference)              |         |                               |         |
| Other trauma                                     | 3539/125874               | 1.04 (0.97, 1.10)             | 0.29    | 1.03 (0.96, 1.09)             | 0.43    |
| Sexual assault or harassment                     | 1729/58953                | 1.06 (0.99, 1.14)             | 0.09    | 1.03 (0.96, 1.11)             | 0.36    |
| Sexual assault and harassment                    | 479/14598                 | 1.18 (1.06, 1.31)             | 0.002   | 1.16 (1.04, 1.29)             | 0.01    |

Note: Sexual harassment refers to workplace sexual harassment. Age (in months) and follow-up wave were stratified.

Model 2: adjusted for age, race/ethnicity, parental education, somatotype at age 5, maternal and paternal hypertension, PTSD and depression.

Model 3: Model 2 plus adjustment for BMI, alcohol use, smoking status, physical activity, diet quality, PTSD and depression.
